# Supplementary material for: Dietary Habits and Psychological States during COVID-19 Home Isolation in Italian College Students: The Role of Physical Exercise
Source: PubMed Central journal article supplement (PMC7759990; doi:10.3390/nu12123660), 2020-11-28
Supplement: nutrients-12-03660-s001.pdf [file nutrients-12-03660-s001.pdf]

**Table S1:** Detailed descriptive statistics of the daily nutritional values, split for males and females.

| Nutritional Variables           | Males  |        |        | Females |        |        |
|---------------------------------|--------|--------|--------|---------|--------|--------|
|                                 | Q1     | Median | Q3     | Q1      | Median | Q3     |
| Energy (kcal)                   | 1267.3 | 1672.5 | 2145.8 | 910.0   | 1197.0 | 1491.8 |
| Protein (g)                     | 60.4   | 81.4   | 110.7  | 43.8    | 59.6   | 79.1   |
| <i>Animal Protein (g)</i>       | 20.4   | 37.3   | 57.8   | 12.7    | 27.0   | 43.3   |
| <i>Plant-based Protein (g)</i>  | 13.6   | 22.2   | 33.3   | 9.4     | 15.7   | 23.7   |
| <i>Protein Value (g)</i>        | 10.2   | 25.2   | 45.4   | 6.3     | 17.4   | 34.4   |
| Lipids (g)                      | 36.0   | 51.8   | 72.9   | 25.7    | 37.8   | 53.3   |
| <i>Saturated Fats (g)</i>       | 9.9    | 16.4   | 25.3   | 6.9     | 11.8   | 18.4   |
| <i>Monounsaturated Fats (g)</i> | 9.1    | 15.6   | 24.0   | 6.2     | 11.3   | 17.6   |
| <i>Polyunsaturated Fats (g)</i> | 3.5    | 5.5    | 8.4    | 2.4     | 3.9    | 6.1    |
| <i>Animal Lipids (g)</i>        | 10.4   | 20.8   | 36.6   | 6.9     | 14.9   | 24.6   |
| <i>Vegetal Lipids (g)</i>       | 4.4    | 11.8   | 21.2   | 3.0     | 8.8    | 16.5   |
| <i>Omega-3 (g)</i>              | 0.4    | 0.7    | 1.1    | 0.3     | 0.5    | 0.9    |
| <i>Omega-6 (g)</i>              | 2.4    | 4.0    | 6.5    | 1.7     | 2.9    | 4.5    |
| Carbohydrate (g)                | 149.9  | 206.5  | 271.4  | 103.4   | 143.5  | 189.1  |
| <i>Starch (g)</i>               | 61.9   | 102.8  | 149.2  | 32.7    | 65.0   | 98.3   |
| <i>Glucides (g)</i>             | 30.2   | 50.7   | 74.8   | 24.2    | 39.5   | 57.3   |
| <i>Glycaemic Index</i>          | 47.8   | 55.0   | 63.8   | 47.6    | 54.5   | 63.2   |
| <i>Glycaemic Load</i>           | 47.2   | 77.5   | 119.5  | 31.5    | 50.8   | 78.8   |
| Soluble Fibre (g)               | 1.0    | 1.9    | 3.1    | 0.7     | 1.5    | 2.5    |
| Insoluble Fibre (g)             | 3.0    | 6.0    | 10.4   | 2.6     | 5.2    | 9.0    |
| Vitamin A (mcg)                 | 303.6  | 683.2  | 1548.5 | 259.0   | 588.4  | 1199.0 |
| Vitamin B6                      | 1.0    | 1.5    | 2.1    | 0.7     | 1.1    | 1.6    |
| Vitamin B12 (mcg)               | 0.7    | 2.3    | 4.9    | 0.3     | 1.5    | 3.5    |
| Vitamin C (mg)                  | 26.7   | 68.9   | 123.1  | 26.8    | 63.0   | 123.2  |
| Vitamin D (mcg)                 | 0.4    | 1.1    | 2.4    | 0.2     | 0.7    | 1.6    |
| Vitamin E (mg)                  | 3.1    | 5.3    | 8.0    | 2.3     | 4.2    | 6.4    |
| Folic Acid (mcg)                | 134.2  | 209.2  | 304.2  | 112.2   | 182.4  | 273.5  |
| Tyrosine (mg)                   | 1080.2 | 1747.3 | 2627.2 | 733.9   | 1325.1 | 1937.8 |
| Phenylalanine (mg)              | 1367.8 | 2216.2 | 3264.9 | 948.8   | 1656.3 | 2405.7 |
| Tryptophan (mg)                 | 328.1  | 555.2  | 827.5  | 220.9   | 405.4  | 614.6  |

Q1: first quartile; Q3: third quartile
